# Supplementary material for: Metabolomics Benefits from Orbitrap GC–MS—Comparison of Low- and High-Resolution GC–MS
Source: Metabolites. 2020 Apr 4;10(4):143. doi: 10.3390/metabo10040143 (PMC7254393; doi:10.3390/metabo10040143)
Supplement: Supplementary file 1 [file metabolites-10-00143-s001.zip › R pipeline.txt]

#versions of R packages used in this work are: R 3.3.3, xcms 1.50.1, CAMERA 1.34, metaMS 1.1, statTarget 1.11)
#this setup seems to be impossible to recreate as a fresh install now
#we modified the script to be compatible with newer versions and should give the same results using: R 3.6.1, xcms 3.6, CAMERA 1.4, metaMS 1.2, statTarget 1.14
#all as a fresh install from https://www.bioconductor.org/


library(xcms)
library(CAMERA)
library(metaMS)
library(stringr)

#first define the working directory (folder with experimental group folders inside)
cdffiles <- list.files("./", recursive = TRUE, full.names = TRUE)
min.clustersize <- 20 #how many fragments need to be in a group for it to be included in the results. 5 - trace compounds; 20 - mostly high quality spectra
useOriginalCode(TRUE) #otherwise matchedFilter will allocate a huge amount of RAM when using step = 0.001

#Refer to XCMS and CAMERA documentation for information about parameters and functions
#These are the parameters used for high rez GC-Orbitrap data
xs1 <- xcmsSet(cdffiles, method = "matchedFilter", fwhm = 3, step = 0.001, steps = 2, max = 1000, snthresh = 3, mzdiff = 0.002)

xs2 <- group(xs1, method = "density", bw = 5, mzwid = 0.002, minsamp = 1, minfrac = 0.5, max = 1000)

xs3 <- retcor(xs2, method = "obiwarp")


# The following parameters were used for low rez GC-ISQ data instead
# xs1 <- xcmsSet(cdffiles, method = "matchedFilter", fwhm = 3, step = 0.1, steps = 2, max = 1000, snthresh = 3, mzdiff = 0.6)

# xs2 <- group(xs1, method = "density", bw = 5, mzwid = 0.6, minsamp = 1, minfrac = 0.5, max = 1000)

# xs3 <- retcor(xs2, method = "obiwarp")

xs4 <- group(xs3, method = "density", bw = 2, mzwid = 0.6, minsamp = 1, minfrac = 0.5, max = 1000)

xs4 <- group(xs3, method = "density", bw = 2, mzwid = 0.002, minsamp = 1, minfrac = 0.5, max = 1000)

xs5 <- fillPeaks(xs4)

xs6 <- xsAnnotate(xs = xs5, sample=NA, polarity = "positive")

xs7 <- groupFWHM(xs6, sigma = 6 , perfwhm = 2, intval = "maxo")

xs8 <- groupCorr(xs7, cor_eic_th = 0.8, calcCaS = TRUE)


peaktable <- getPeaklist(xs8, intval="into")
write.csv(peaktable, file = "untreated_peaktable.csv") #This creates a peaktable .csv file with all m/z features sorted into "compounds"

#the following script identifies all "compounds" considered too small according to min.clustersize
#you don't need to modify anything, that run the next part as is
peaktable <- getPeaklist(xs8, intval="maxo")
pcgroups <- sort(unique(as.numeric(peaktable$pcgroup)))
lspectra <- NULL
extra <- NULL
small.clusters <- NULL
big.clusters <- NULL
n <- 1
for(x in pcgroups)
{
  clustersize <- length(peaktable[peaktable$pcgroup==x,ncol(peaktable)])
  if(clustersize < as.numeric(min.clustersize))
  {
    small.clusters <- c(small.clusters, x)
  }
  else
  {
    big.clusters <- c(big.clusters, x)
    gruppe1 <- peaktable[peaktable$pcgroup==x,]
    gruppe1 <- gruppe1[, -(2:(ncol(gruppe1)-3-(length(cdffiles))))]
    gruppe1 <- gruppe1[, -(ncol(gruppe1):(ncol(gruppe1)-2))]
    decider <- NULL
    for(i in 2:ncol(gruppe1))
    {
      decider <- c(decider, sum(gruppe1[, i]))
    }
    highest <- which(decider==max(decider), arr.ind = TRUE)
    gruppe1 <- data.frame(gruppe1[, 1], gruppe1[, highest[1]+1])
    colnames(gruppe1) <- c("mz", "int")
    lspectra[[n]] <- gruppe1
    n <- n+1
  }
}
reduced.peaktable <- getReducedPeaklist(xs8, method = "sum", intval = "into", default.adduct.info = "maxint", mzrt.range = FALSE, npeaks.sum = FALSE, cleanup = FALSE)
if(is.null(small.clusters)==FALSE) {
  for(z in small.clusters)
  {
    reduced.peaktable <- reduced.peaktable[-(which(reduced.peaktable[, ncol(reduced.peaktable)]==z)), ]
  }
}
write.csv(reduced.peaktable, file = "peaktable.csv") #This creates a peaktable .csv file with only "compounds" instead of m/z features
extra <- data.frame(Name = paste("Unknown", big.clusters, "RT =",round(reduced.peaktable$rt/60, 2) ), Class = "Unknown", stringsAsFactors = FALSE)
export.msp <- construct.msp(lspectra, extra)
write.msp(export.msp, file = "spectra.msp") #This creates a NIST MS Search compatible .msp file with all compound pseudospectra


#######################################################################################
#Refer to statTarget documentation and tutorial for information about parameters
library(statTarget)
shiftCor("PhenoFile.csv", "ProfileFile.csv", MLmethod = "QC-RLSC", degree = 0, QCspan = 0.75, plot = TRUE)
